# Supplementary material for: The potential for adaptive maintenance of diversity in insect antimicrobial peptides
Source: PubMed Central journal article supplement (PMC4874389; doi:10.1098/rstb.2015.0291), 2016-05-26

## Supplementary material

**Table S1.** Counts of TSPs and polymorphisms (that are not TSPs) in AMP and control genes.

| Gene                  | Category | Coordinates                   | Length (bp) | D. melanogaster/<br>D. simulans |       | D. melanogaster/<br>D. mauritiana |       | D. melanogaster/<br>D. yakuba |       | D. simulans/<br>D. mauritiana |       | D. simulans/<br>D. yakuba |       | D. mauritiana/<br>D. yakuba |       |
|-----------------------|----------|-------------------------------|-------------|---------------------------------|-------|-----------------------------------|-------|-------------------------------|-------|-------------------------------|-------|---------------------------|-------|-----------------------------|-------|
|                       |          |                               |             | TSP                             | Other | TSP                               | Other | TSP                           | Other | TSP                           | Other | TSP                       | Other | TSP                         | Other |
| Mtk                   | AMP      | 2R:15,408,846..15,409,113 [+] | 162         | 1                               | 7     | 1                                 | 2     | 1                             | 10    | 1                             | 7     | 1                         | 14    | 1                           | 8     |
| Def                   | AMP      | 2R:10,054,178..10,054,576 [-] | 279         | 0                               | 13    | 1                                 | 4     | 0                             | 4     | 0                             | 12    | 1                         | 10    | 0                           | 3     |
| Dro                   | AMP      | 2R:14,745,961..14,746,714 [+] | 195         | 1                               | 8     | 0                                 | 4     | 0                             | 10    | 0                             | 6     | 0                         | 12    | 0                           | 6     |
| CecB                  | AMP      | 3R:30,213,315..30,213,797 [-] | 192         | 0                               | 6     | 0                                 | 3     | 1                             | 4     | 1                             | 4     | 0                         | 9     | 0                           | 6     |
| CecA                  | AMP      | 3R:30,210,874..30,211,273 [+] | 192         | 1                               | 5     | 1                                 | 3     | 1                             | 5     | 0                             | 4     | 0                         | 7     | 0                           | 4     |
| DptB                  | AMP      | 2R:18,867,391..18,867,895 [+] | 363         | 0                               | 10    | 1                                 | 15    | 0                             | 11    | 0                             | 13    | 0                         | 7     | 0                           | 11    |
| AttA                  | AMP      | 2R:14,747,362..14,748,215 [+] | 663         | 2                               | 21    | 1                                 | 19    | NA                            | NA    | 2                             | 10    | NA                        | NA    | NA                          | NA    |
| AttB                  | AMP      | 2R:14,749,223..14,750,165 [+] | 657         | 2                               | 12    | 1                                 | 14    | NA                            | NA    | 1                             | 14    | NA                        | NA    | NA                          | NA    |
| AttC                  | AMP      | 2R:13,393,705..13,394,667 [+] | 734         | 0                               | 20    | 1                                 | 19    | 0                             | 18    | 0                             | 21    | 0                         | 18    | 0                           | 20    |
| AttD                  | AMP      | 3R:17,625,268..17,626,086 [+] | 546         | 1                               | 37    | 0                                 | 27    | 0                             | 11    | 4                             | 35    | 0                         | 29    | 0                           | 20    |
| Dpt                   | AMP      | 2R:18,865,765..18,866,260 [+] | 319         | 1                               | 6     | 0                                 | 3     | 0                             | 8     | 0                             | 6     | 0                         | 9     | 0                           | 6     |
| CG31441               | Control  | 3R:11,236,286..11,237,624 [+] | 147         | 0                               | 5     | 0                                 | 4     | 0                             | 1     | 0                             | 6     | 0                         | 4     | 0                           | 3     |
| CG8204                | Control  | 2R:15,573,144..15,573,991 [-] | 432         | 1                               | 27    | 1                                 | 14    | 0                             | 8     | 2                             | 30    | 0                         | 23    | 1                           | 19    |
| ave                   | Control  | 2R:14,752,521..14,753,269 [+] | 21          | 0                               | 1     | 0                                 | 1     | 0                             | 0     | 0                             | 2     | 0                         | 1     | 0                           | 0     |
| CG12861               | Control  | 2R:14,664,246..14,665,356 [-] | 720         | 0                               | 5     | 0                                 | 7     | 0                             | 5     | 0                             | 6     | 0                         | 4     | 0                           | 6     |
| CG15107               | Control  | 2R:18,971,309..18,972,537 [-] | 741         | 0                               | 17    | 0                                 | 14    | 0                             | 24    | 0                             | 16    | 1                         | 23    | 0                           | 23    |
| CG33998               | Control  | 2R:18,738,492..18,739,143 [+] | 360         | 1                               | 7     | 0                                 | 9     | 1                             | 9     | 1                             | 7     | 0                         | 9     | 0                           | 8     |
| CG15863               | Control  | 2R:9,959,119..9,959,732 [-]   | 399         | 0                               | 7     | 0                                 | 3     | 0                             | 4     | 0                             | 8     | 1                         | 7     | 0                           | 5     |
| Sec61Beta             | Control  | 2R:14,618,771..14,619,681 [+] | 303         | 0                               | 1     | 0                                 | 1     | 0                             | 1     | 0                             | 0     | 0                         | 0     | 0                           | 0     |
| CG15529               | Control  | 3R:30,152,059..30,153,699 [+] | 591         | 0                               | 12    | 0                                 | 14    | 0                             | 17    | 2                             | 10    | 0                         | 13    | 0                           | 15    |
| CG15526               | Control  | 3R:30,055,957..30,056,603 [+] | 342         | 0                               | 13    | 0                                 | 6     | 0                             | 7     | 0                             | 11    | 0                         | 12    | 0                           | 6     |
| mRpS18C               | Control  | 3R:30,423,974..30,424,556 [+] | 423         | 0                               | 8     | 0                                 | 7     | 0                             | 10    | 0                             | 7     | 0                         | 10    | 0                           | 9     |
| CG30065               | Control  | 2R:13,433,028..13,433,760 [+] | 141         | 0                               | 7     | NA                                | NA    | 0                             | 7     | NA                            | NA    | 0                         | 6     | NA                          | NA    |
| CG31360               | Control  | 3R:17,685,097..17,685,807 [+] | 297         | 0                               | 5     | 1                                 | 5     | 0                             | 3     | 0                             | 7     | 0                         | 3     | 1                           | 4     |
| Logistic regression P |          |                               |             | 0.073                           |       | 0.201                             |       | 0.239                         |       | 0.472                         |       | 1                         |       | 0.655                       |       |

TSP=trans-species polymorphism

Other=Other polymorphic amino acid residues (in one or both species)

Chr=chromosome

Coordinates=chromosome coordinates from FlyBase release 6 (FB2015\_05) for *D.*

*melanogaster*; +/- represent strand

**Table S2.** Weighted mean and standard deviation (SD) of synonymous divergence in the genes used for TSP analysis for each species pair.

| <b>Species 1</b>       | <b>Species 2</b>     | <b>Mean</b> | <b>SD</b> |
|------------------------|----------------------|-------------|-----------|
| <i>D. melanogaster</i> | <i>D. simulans</i>   | 0.144       | 0.058     |
| <i>D. melanogaster</i> | <i>D. yakuba</i>     | 0.332       | 0.091     |
| <i>D. melanogaster</i> | <i>D. mauritiana</i> | 0.147       | 0.052     |
| <i>D. simulans</i>     | <i>D. Yakuba</i>     | 0.301       | 0.099     |
| <i>D. simulans</i>     | <i>D. mauritiana</i> | 0.053       | 0.045     |
| <i>D. Yakuba</i>       | <i>D. mauritiana</i> | 0.308       | 0.091     |

**Table S3.** Nonsynonymous polymorphism and divergence in *D. simulans* AMPs from Begun *et al.* 2007.

| Gene Name | Chr | Position | $\pi_a$ | $d_n$  |
|-----------|-----|----------|---------|--------|
| AttA      | 2R  | 14747391 | 0.0057  | 0.0251 |
| AttB      | 2R  | 14749255 | 0.0051  | 0.0052 |
| AttC      | 2R  | 13393769 | 0.0015  | 0.0102 |
| AttD      | 3R  | 17625324 | 0.022   | 0.0192 |
| IM1       | 2R  | 18384023 | 0.0103  | 0.0153 |
| CG18107   | 2R  | 18384637 | 0.004   | 0.0393 |
| IM2       | 2R  | 18386673 | 0.0051  | 0.0128 |
| IM3       | 2R  | 18388185 | 0       | 0.0121 |
| CG15065   | 2R  | 18389989 | 0.06    | 0.0404 |
| CG15068   | 2R  | 18390395 | 0       | 0.0226 |
| CG16836   | 2R  | 18389100 | 0.0256  | 0.0497 |
| IM23      | 2R  | 18382789 | 0.0046  | 0.0321 |
| CG15067   | 2R  | 18385055 | 0.0015  | 0.0126 |
| CG5791    | 3R  | 22087203 | 0.0023  | 0.0154 |
| CecA1     | 3R  | 30210948 | 0.0056  | 0.0099 |
| CecB      | 3R  | 30213479 | 0       | 0.007  |
| CecC      | 3R  | 30216577 | 0       | 0      |
| Def       | 2R  | 10054292 | 0.0019  | 0.0153 |
| DptB      | 2R  | 18867422 | 0.0056  | 0.0159 |
| Dro       | 2R  | 14745990 | 0.0087  | 0.0205 |
| Drs       | 3L  | 3369619  | 0       | 0      |
| Drsl-1    | 3L  | 3335582  | 0       | 0.0358 |
| Drsl-2    | 3L  | 3314375  | 0.0031  | 0.0015 |
| Drsl-3    | 3L  | 3315034  | 0.0062  | 0.0348 |
| Drsl-4    | 3L  | 3315637  | 0       | 0      |
| Drsl-5    | 3L  | 3316835  | 0       | 0      |
| Drsl-6    | 3L  | 3336147  | 0.0042  | 0.021  |
| Mtk       | 2R  | 15408876 | 0.0116  | 0.0058 |

Chromosome positions refer to release 6 (FB2015\_05) in *D. melanogaster*.

**Table S4.** Trans-species polymorphisms in control genes. Reported as PA<sub>1</sub>A<sub>2</sub> where P is position in alignment, A<sub>1</sub> and A<sub>2</sub> are the two amino acid alleles. ND – no comparison due to poor alignments.

| Gene           | <i>mel-sim</i> | <i>mel-mau</i> | <i>mel-yak</i> | <i>sim-mau</i> | <i>sim-yak</i> | <i>mau-yak</i> |
|----------------|----------------|----------------|----------------|----------------|----------------|----------------|
| <i>CG31441</i> | -              | -              | -              | -              | -              | -              |
| <i>CG8204</i>  | R12K           | A31T           | -              | E71T<br>A139T  | -              | N47K           |
| <i>ave</i>     | -              | -              | -              | -              | -              | -              |
| <i>CG12861</i> | -              | -              | -              | -              | -              | -              |
| <i>CG15107</i> | -              | -              | -              | -              | I190L          | -              |
| <i>CG33998</i> | A14T           | -              | T89I           | K87Y           | -              | -              |
| <i>CG15863</i> | -              | -              | -              | -              | M88L           | -              |
| <i>Sec61β</i>  | -              | -              | -              | -              | -              | -              |
| <i>CG15529</i> | -              | -              | -              | G47D<br>60SP   | -              | -              |
| <i>CG15526</i> | -              | -              | -              | -              | -              | -              |
| <i>MRPS18C</i> | -              | -              | -              | -              | -              | -              |
| <i>CG30065</i> | -              | ND             | -              | ND             | -              | ND             |
| <i>CG31360</i> | -              | E81K           | -              | -              | -              | S100F          |

**Table S5.** Trans-species polymorphisms (TSPs) summed across all genes for AMPs and a control set. P-values assessed using logistic regression (see methods). P-value for total significance based on Fisher’s method for combining P-values.

| <b>Constrast</b>                     | <b>AMP TSPs</b> | <b>Control TSPs</b> | <b>P-value</b> |
|--------------------------------------|-----------------|---------------------|----------------|
| <i>D. melanogaster/D. simulans</i>   | 9/1459          | 2/1771              | <b>0.012</b>   |
| <i>D. melanogaster/D. mauritiana</i> | 7/1459          | 2/1771              | 0.053          |
| <i>D. melanogaster/D. yakuba</i>     | 3/987           | 1/1771              | 0.110          |
| <i>D. simulans/D. mauritiana</i>     | 9/1459          | 5/1771              | 0.177          |
| <i>D. simulans/D. yakuba</i>         | 2/987           | 2/1771              | 0.561          |
| <i>D. mauritiana/D. yakuba</i>       | 1/987           | 2/1771              | 0.897          |
| <b>Total</b>                         | 32/7338=0.004   | 14/10626=0.001      | 0.055          |

**Figure S1.** Bootstrapped Neighbor-Joining tree of *Drosophila Attacin A* (circles) and *Attacin B* (squares) sequences. Colors represent: black=*D. yakuba*, green=*D. simulans*, blue=*D. mauritiana* and orange=*D. melanogaster*. Node labels are bootstrap values for nodes with better than 50% bootstrap support.

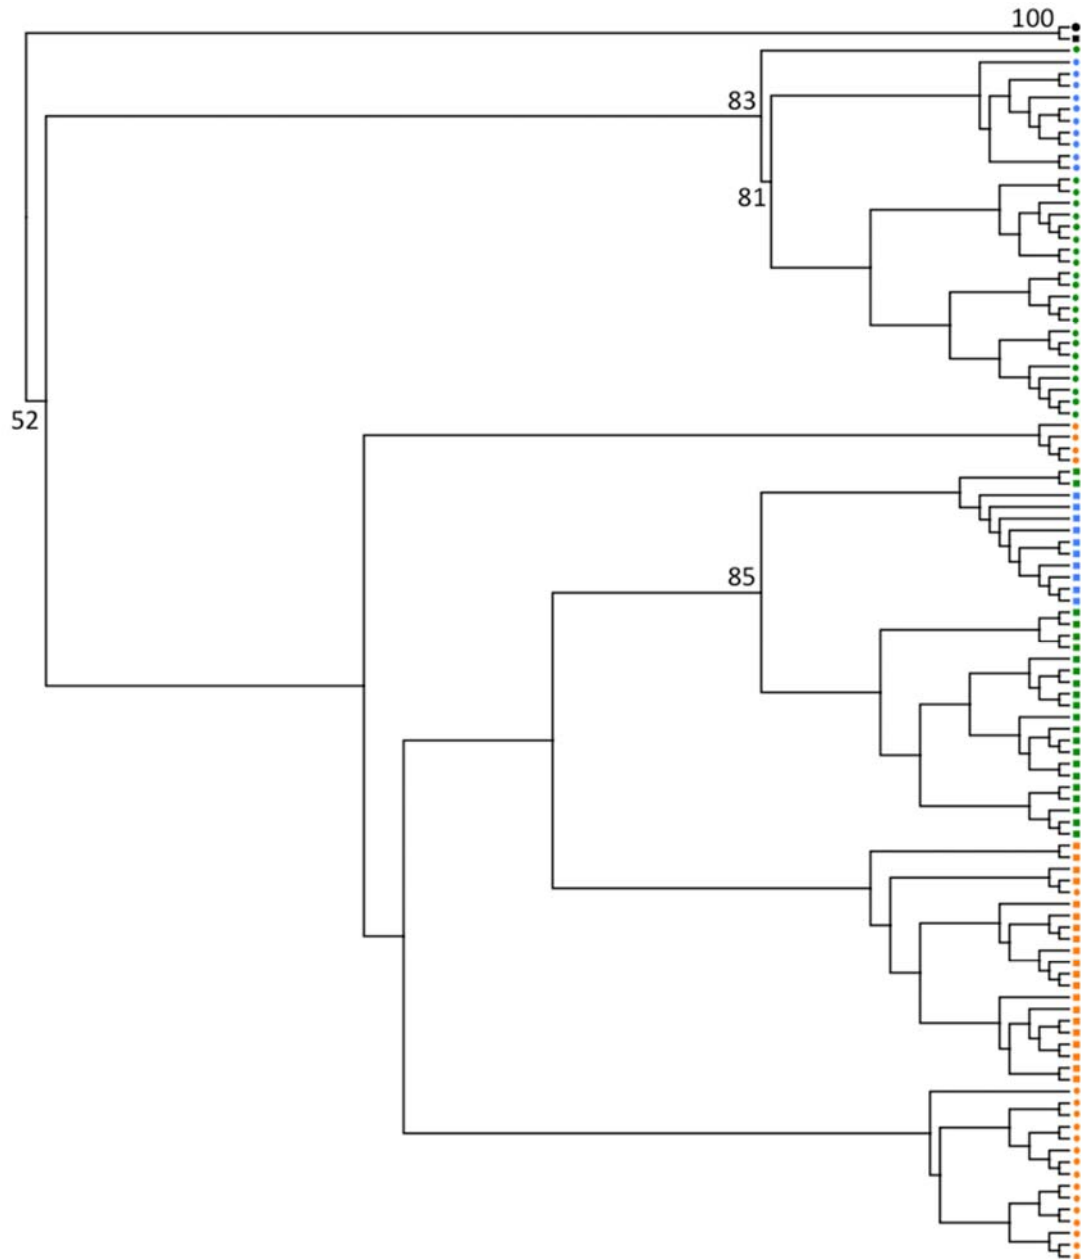

**Figure S2.** Convergence of TSPs on the *Drosophila* phylogeny. Letters represent amino acids at the position along the top row (indicated for each gene – see Table 1). We considered polymorphism data for *D. mauritiana*, *D. simulans*, *D. mauritiana* and *D. yakuba*. Segregating amino acids are indicated by consecutive numbers. Amino acids in close paralogs are separated by a slash. Dashes represent data unavailable due to poor alignments or lack of sequence. Colours are used to visually differentiate alleles.

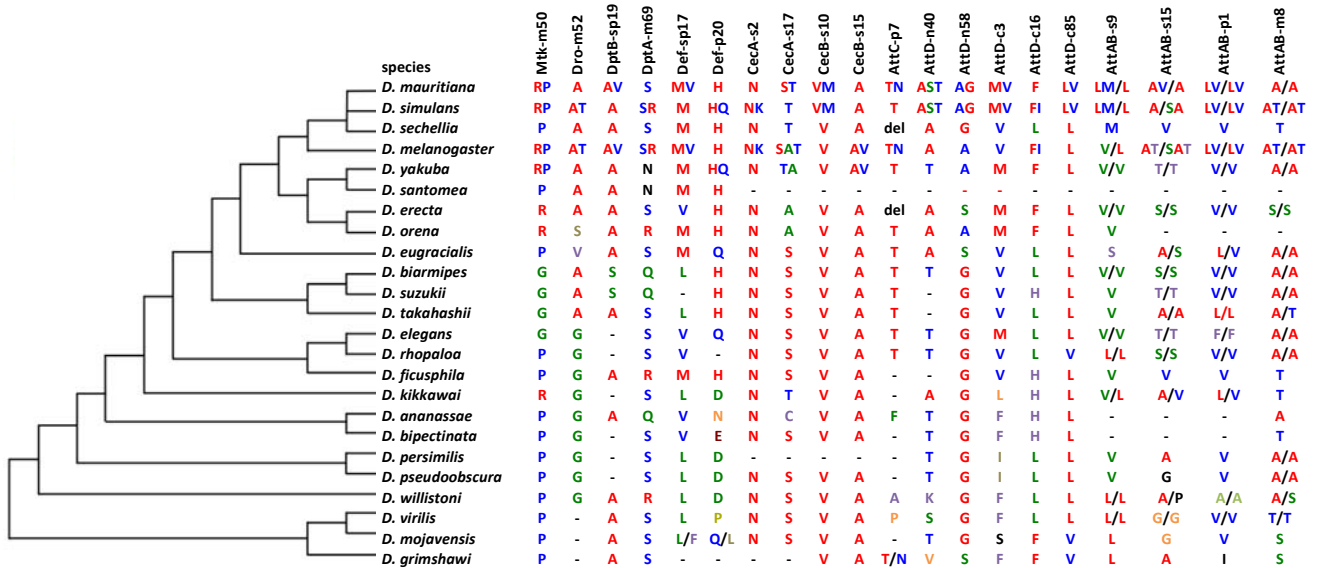

Supplement: rstb20150291supp1.pdf [file rstb20150291supp1.pdf]
